# Supplementary material
Source: Springer Nature journal article supplement (https://www.springermedizin.de/resource/supplementary/12885_2010_2927_MOESM6_ESM.pdf/9462276)

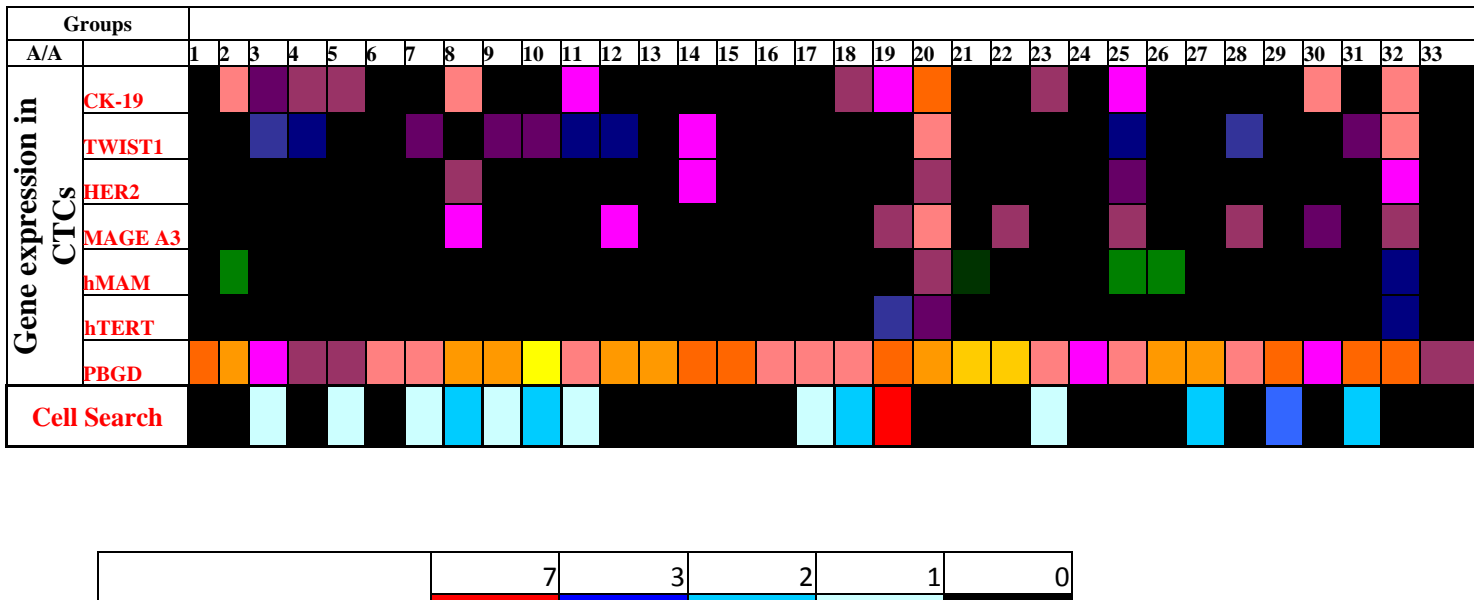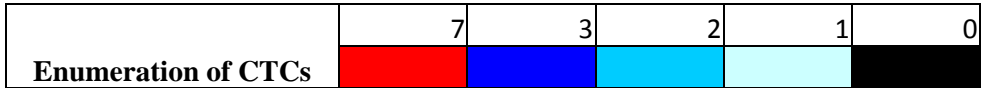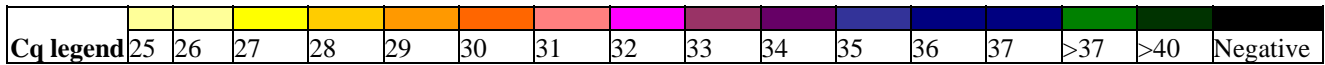

Supplement: MOESM6 [file 9462276]
